# Supplementary material for: The Box Tree Moth: An Invasive Species Severely Threatening Buxus Natural Formation in NW Italy
Source: MDPI journal article supplement (doi:10.3390/f13020178), 2022-01-24
Supplement: s1 [file s1]

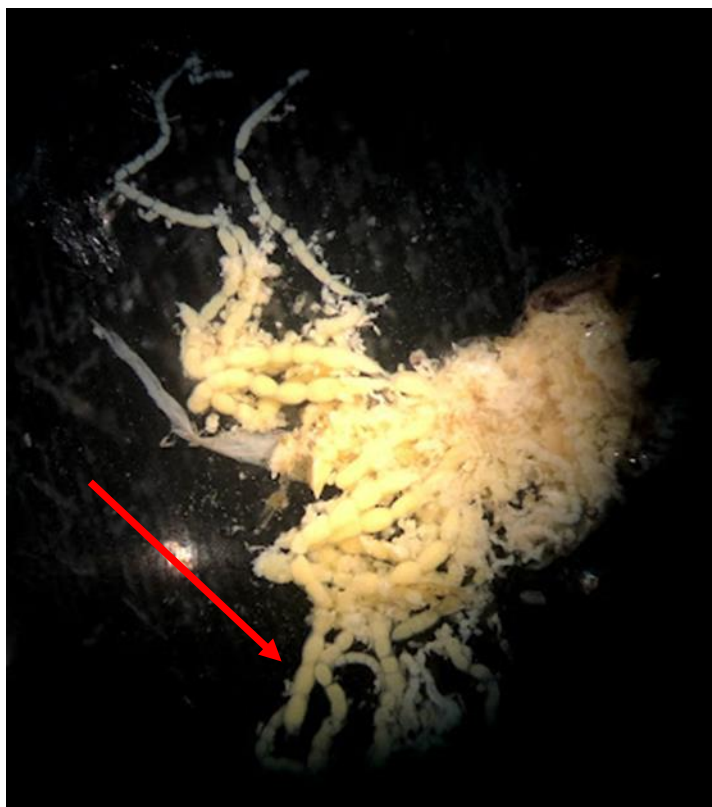

Supplementary Figure S1 - Egg load assessed by dissecting the abdomen of a female of *Cydalima perspectalis* (Walker). The number of mature eggs was counted under a microscope at 115 × magnification. Bigger and well-formed eggs with a smooth surface were categorized as mature eggs (red arrow).

Supplementary Table S1 - Sampling sites monitored in the three-year period 2019–2021

| Surveyed site | Province | Geographic coordinates |              | Altitude<br>(a.s.l.) |
|---------------|----------|------------------------|--------------|----------------------|
|               |          | N                      | E            |                      |
| Garessio      | Cuneo    | 44 °10'33.7"           | 07 °59'10.1" | 450 m                |
| Pradleves     | Cuneo    | 44 °24'44.6"           | 07 °16'16.3" | 813 m                |
| Vernante      | Cuneo    | 44 °14'13.1"           | 07 °32'36.3" | 857 m                |
